# Supplementary material for: Automated drusen detection in retinal images using analytical modelling algorithms
Source: Springer Nature journal article supplement (doi:10.1186/1475-925x-10-59), 2011-01-01
Supplement: 12938_2010_468_MOESM4_ESM.pdf [file 12938_2010_468_MOESM4_ESM.pdf]

(a1)

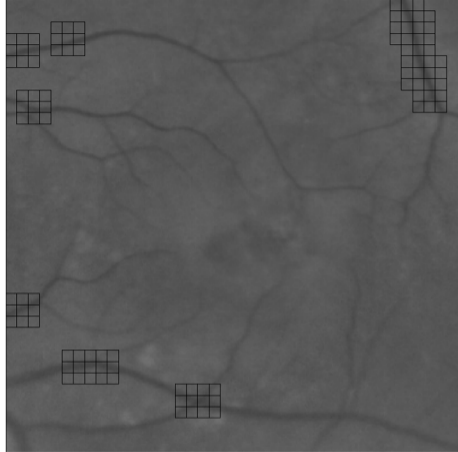

(a2)

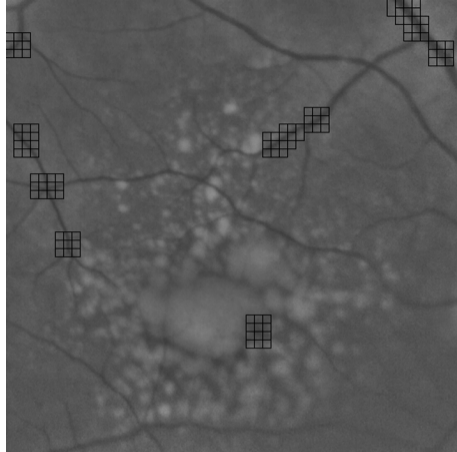

(b1)

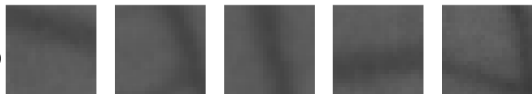

8,12

8,14

8,16

8,22

8,24

(b2)

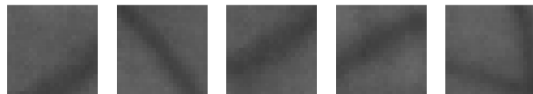

9,58

9,62

9,75

9,97

10,47
