# Supplementary material for: Automated drusen detection in retinal images using analytical modelling algorithms
Source: Springer Nature journal article supplement (doi:10.1186/1475-925x-10-59), 2011-01-01
Supplement: 12938_2010_468_MOESM5_ESM.pdf [file 12938_2010_468_MOESM5_ESM.pdf]

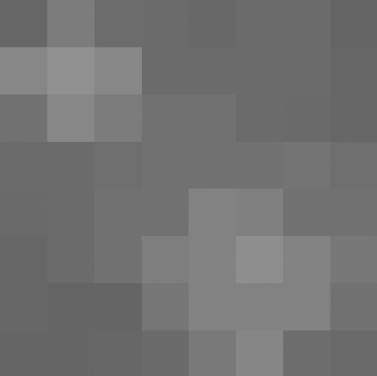

(a)

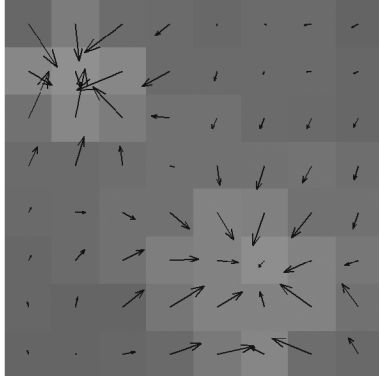

(b)

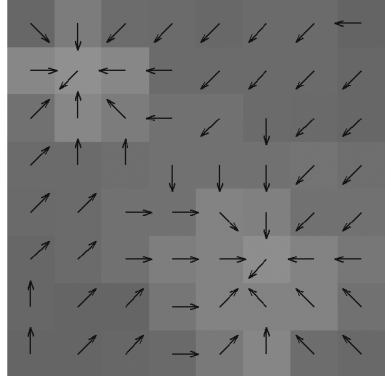

(c)

|    |    |    |    |    |    |    |    |
|----|----|----|----|----|----|----|----|
| 1  | 2  | 3  | 4  | 5  | 6  | 7  | 8  |
| 9  | 1  | 4  | 5  | 6  | 7  | 10 | 11 |
| 1  | 12 | 6  | 6  | 7  | 10 | 11 | 13 |
| 14 | 15 | 16 | 7  | 17 | 10 | 13 | 18 |
| 19 | 20 | 21 | 7  | 7  | 10 | 18 | 22 |
| 23 | 24 | 25 | 25 | 25 | 7  | 22 | 26 |
| 27 | 28 | 29 | 30 | 7  | 31 | 32 | 33 |
| 34 | 35 | 36 | 37 | 37 | 38 | 39 | 40 |

(d)

| Labels | 14 | 12 | 28 | 25 |
|--------|----|----|----|----|
| 1      | 15 | 12 | 29 | 25 |
| 2      | 16 | 6  | 30 | 7  |
| 3      | 17 | 7  | 31 | 25 |
| 4      | 18 | 7  | 32 | 7  |
| 5      | 19 | 15 | 33 | 22 |
| 6      | 20 | 16 | 34 | 27 |
| 7      | 21 | 7  | 35 | 29 |
| 8      | 22 | 7  | 36 | 30 |
| 9      | 23 | 20 | 37 | 31 |
| 10     | 24 | 21 | 38 | 31 |
| 11     | 25 | 7  | 39 | 31 |
| 12     | 26 | 22 | 40 | 32 |
| 13     | 27 | 23 |    |    |

(e)

|   |   |   |   |   |   |   |   |
|---|---|---|---|---|---|---|---|
| 1 | 1 | 1 | 1 | 1 | 1 | 7 | 7 |
| 1 | 1 | 1 | 1 | 1 | 7 | 7 | 7 |
| 1 | 1 | 1 | 1 | 7 | 7 | 7 | 7 |
| 1 | 1 | 1 | 7 | 7 | 7 | 7 | 7 |
| 1 | 1 | 7 | 7 | 7 | 7 | 7 | 7 |
| 1 | 7 | 7 | 7 | 7 | 7 | 7 | 7 |
| 1 | 7 | 7 | 7 | 7 | 7 | 7 | 7 |
| 1 | 7 | 7 | 7 | 7 | 7 | 7 | 7 |

(f)
