# Supplementary material for: Automated drusen detection in retinal images using analytical modelling algorithms
Source: Springer Nature journal article supplement (doi:10.1186/1475-925x-10-59), 2011-01-01
Supplement: 12938_2010_468_MOESM9_ESM.pdf [file 12938_2010_468_MOESM9_ESM.pdf]

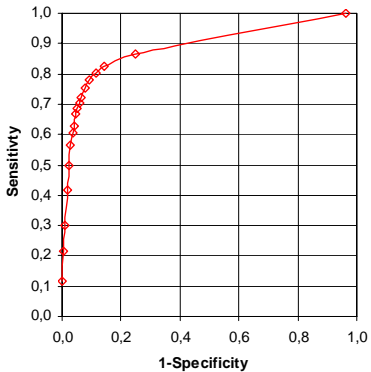

(a)

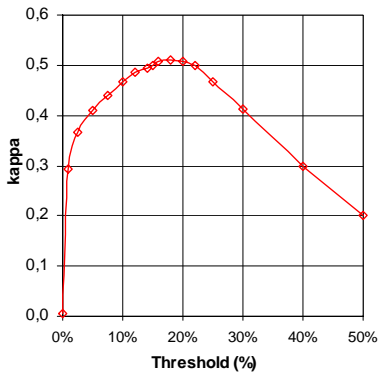

(b)

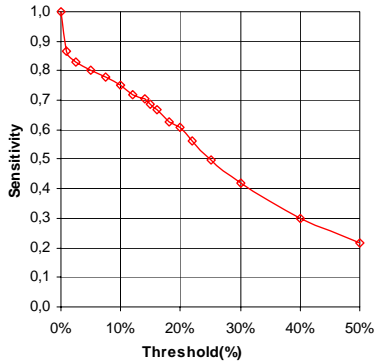

(c)
